# Supplementary material for: Psychological Reactions of Hospital Workers to a Pandemic: A Comparison of SARS-CoV-2 in 2020 and SARS in 2003
Source: MDPI journal article supplement (doi:10.3390/ijerph19020833), 2022-01-12
Supplement: s1 [file s1]

**Table S1.** Comparison of psychiatric morbidity in clinical characteristics of hospital workers who have SARS experience.

| Variable                           | CHQ<3<br>N=538 (%) | CHQ≥3<br>N =158(%) | $\chi^2$ | p      |
|------------------------------------|--------------------|--------------------|----------|--------|
| <b>Gender:</b>                     |                    |                    | 5.98     | 0.01   |
| Female                             | 431(80.1)          | 140(88.6)          |          |        |
| Male                               | 107(19.9)          | 18(11.4)           |          |        |
| <b>Age, years:</b>                 | 48.4±6.2           | 32.6±6.9           | -50.80   | <0.001 |
| <b>Job title:</b>                  |                    |                    | 8.01     | 0.09   |
| Doctor                             | 38(7.1)            | 4(2.5)             |          |        |
| Nurse                              | 285(53.0)          | 88(55.7)           |          |        |
| Others                             | 215(40.0)          | 66(41.8)           |          |        |
| <b>Work experience, years</b>      | 25.3±6.1           | 8.3±6.0            | -58.16   | <0.001 |
| <b>Marital status</b>              |                    |                    | 0.85     | 0.36   |
| Married                            | 421(78.3)          | 129(81.6)          |          |        |
| Unmarried                          | 117(21.7)          | 29(18.4)           |          |        |
| <b>Living condition: n (%)</b>     |                    |                    | 0.03     | 0.86   |
| With family                        | 467(86.8)          | 138(87.3)          |          |        |
| Dormitory/other                    | 71(13.2)           | 20(12.7)           |          |        |
| <b>Care of SARS-Cov-2 patients</b> |                    |                    | 4.27     | 0.12   |
| Yes                                | 19(3.5)            | 8(5.1)             |          |        |
| Not sure                           | 10(1.9)            | 7(4.4)             |          |        |
| No                                 | 509(94.6)          | 143(90.5)          |          |        |
| <b>Quarantine</b>                  |                    |                    | 0.46     | 0.50   |
| Yes                                | 42(7.8)            | 15(9.5)            |          |        |
| No                                 | 496(92.2)          | 143(90.5)          |          |        |
| <b>IES total scores</b>            | 9.41±9.1           | 18.8±11.3          | 9.57     | <0.001 |
| Intrusion                          | 4.8±4.8            | 10.1±6.4           | 9.68     | <0.001 |
| Avoidance                          | 4.6±4.9            | 8.7±5.9            | 8.78     | <0.001 |
| <b>DT</b>                          | 1.9±1.6            | 4.1±1.9            | 13.52    | <0.001 |

CHQ: Chinese Health Questionnaire; DT: Distress Thermometer; IES: Impact of Event Scale.
